# Supplementary material
Source: Springer Nature journal article supplement (https://www.springermedizin.de/resource/supplementary/12879_2014_3164_MOESM6_ESM.pdf/9446124)

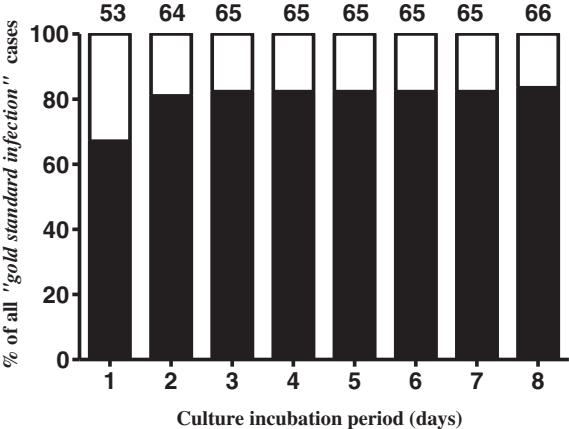

**■ Detected (culture positive)**

**□ Not detected (culture negative)**

Supplement: MOESM6 [file 9446124]
